# Supplementary material for: Information and Communication Technologies in the Care of the Elderly: Systematic Review of Applications Aimed at Patients With Dementia and Caregivers
Source: PubMed Central journal article supplement (PMC5454565; doi:10.2196/rehab.5226), 2016-05-02
Supplement: rehab_v3i1e6_app2.pdf [file rehab_v3i1e6_app2.pdf]

| <i>Year</i> | <i>Name of application</i> | <i>Database</i> | <i>Objective</i>                                                                                                                 | <i>Type of group</i>          | <i>Type of application</i>     | <i>Technology applied</i>           | <i>Domain of application</i> | <i>Significant Findings</i>                                                                                                                                                                                                                                                                                                                                                                        |
|-------------|----------------------------|-----------------|----------------------------------------------------------------------------------------------------------------------------------|-------------------------------|--------------------------------|-------------------------------------|------------------------------|----------------------------------------------------------------------------------------------------------------------------------------------------------------------------------------------------------------------------------------------------------------------------------------------------------------------------------------------------------------------------------------------------|
| 2005        | AlzOnline [49]             | Scopus          | AlzOnline is a Web and telephone-based education and support network for caregivers of individuals with progressive dementia.    | Informal caregivers           | Teleassistance                 | Internet<br>IS<br>Telecommunication | Care<br>Quality of life      | AlzOnline has the potential of serving as a prototype for other state elder care agencies and provider networks to follow. However, before AlzOnline and other newly developed Internet-based alternative health care delivery approaches are widely adopted, further research is needed to assess their efficacy, cost-effectiveness and generalizability across different caregiver populations. |
| 2007        | eCare [50]                 | Scopus          | eCare is a technology-based psychoeducational intervention for family caregivers of dementia patients.                           | Informal caregivers           | Teleassistance                 | Telecommunication                   | Care<br>Quality of life      | The findings show that existing technology can be used to deliver a multicomponent intervention effectively and efficiently for the caregivers. Besides, the caregivers were very receptive to using the technology and found it easy to use.                                                                                                                                                      |
| 2009        | Social Support Online [51] | Springer Link   | The applications is an online platform where caregivers of patients suffering from Alzheimer's disease can share social support. | Informal caregivers           | Teleassistance                 | IS<br>Internet                      | Care<br>Quality of life      | In this study, the benefits of designing online systems for social support for the family caregivers are presented. These systems help alleviate distress by providing greater social support to caregivers. However, the platform that presented in this study is not yet evaluated.                                                                                                              |
| 2009        | iCOPE [52]                 | Springer Link   | iCOPE aims at providing caregivers and family members with a monitoring system for                                               | Caregivers and family members | Telemedicine<br>Teleassistance | IS<br>Telecommunication             | Management                   | This study shows how the iCOPE system promoted independent living and improves quality of life for                                                                                                                                                                                                                                                                                                 |

| <i>Year</i> | <i>Name of application</i>            | <i>Database</i> | <i>Objective</i>                                                                                                                                                                                                                   | <i>Type of group</i>           | <i>Type of application</i>      | <i>Technology applied</i>                            | <i>Domain of application</i> | <i>Significant Findings</i>                                                                                                                                                                                                                                                                                                                                |
|-------------|---------------------------------------|-----------------|------------------------------------------------------------------------------------------------------------------------------------------------------------------------------------------------------------------------------------|--------------------------------|---------------------------------|------------------------------------------------------|------------------------------|------------------------------------------------------------------------------------------------------------------------------------------------------------------------------------------------------------------------------------------------------------------------------------------------------------------------------------------------------------|
|             |                                       |                 | elders with cognitive and functional impairment. This system allows: medication management, sleep activity monitoring, tele-physiotherapy and respiratory monitoring.                                                              |                                |                                 | ation<br>Signal processing                           |                              | elderly persons living alone. Also, can provide valuable backup since it operates round the clock.                                                                                                                                                                                                                                                         |
| 2011        | Support Environment [53]              | Springer Link   | Support Environment is a video monitoring system for caregivers to optimize their work and help them concentrate on their tasks at hand, reducing both mental and physical stress.                                                 | Primary caregivers             | Telemedicine<br>Teleassistance  | Telecommunication<br>IS                              | Management                   | The video monitoring system presented in this study, optimizes the work of the caregivers and helped the concentrate on their tasks at hand, reducing both mental and physical stresses. On the other hand, some caregivers expressed concerns over being watched by other caregivers through the monitor, especially when their activities were recorded. |
| 2013        | CaregiverNet [54]                     | Scopus          | This system is a social support network of caregivers for locating and securing wandering patients, through a tracking device installed in a Subscriber Identity Module for Global System for Mobile Communications Network (GSM). | Informal caregivers            | Mobile health<br>Teleassistance | Internet<br>Mobile telecommunications<br>Geolocation | Care<br>Quality of life      | This study proposes a new type of intervention based on novel mobile application architecture to form and direct a social support network of caregivers for locating and securing wandering patients as soon as possible. However, the application has not yet been evaluated.                                                                             |
| 2013        | Android-Based Mobile Application [55] | Google Scholar  | The Android-based mobile application aims at assisting doctors in monitoring Alzheimer's patient medication.                                                                                                                       | Health professionals (Doctors) | Mobile health<br>Teleassistance | Internet<br>Mobile telecommunications                | Care<br>Management           | The response from the doctors shows that the proposed application is a suitable tool to support and assist doctors to monitor and communicate with their Alzheimer's patient. In future, further assessment                                                                                                                                                |

| <i>Year</i> | <i>Name of application</i> | <i>Database</i> | <i>Objective</i>                                                                                                                                                                        | <i>Type of group</i>                       | <i>Type of application</i>      | <i>Technology applied</i>             | <i>Domain of application</i> | <i>Significant Findings</i>                                                                                                                                                                                                                                                                                                                                                                                                                                                                                                                         |
|-------------|----------------------------|-----------------|-----------------------------------------------------------------------------------------------------------------------------------------------------------------------------------------|--------------------------------------------|---------------------------------|---------------------------------------|------------------------------|-----------------------------------------------------------------------------------------------------------------------------------------------------------------------------------------------------------------------------------------------------------------------------------------------------------------------------------------------------------------------------------------------------------------------------------------------------------------------------------------------------------------------------------------------------|
| 2013        | mobileWAY [56]             | Scopus          | The mobileWAY is a system that enables caregivers of persons with dementia (PwD) to remotely display dynamic, customized and illustrated information on the home television of the PwD. | Primary caregivers and informal caregivers | Mobile health<br>Teleassistance | Mobile telecommunications<br>Internet | Care<br>Quality of life      | <p>need to be conducted to evaluate its usability among Alzheimer's patients and their caretakers.</p> <p>The results of the evaluations with mobileWAY seem to indicate that this system may offer potential for increasing self-esteem and reducing behavioural disturbances of PwD with the use of photos and video for reminiscence therapy. One drawback of mobileWAY is the temporary or permanent attendance of the primary caregiver since it is neither replacing human caregiving nor a complete round-the-clock surveillance system.</p> |
| 2014        | Understaid [57]            | Google Scholar  | UnderstAID is a platform that helps informal caregivers to understand and aid their relatives with dementia. It is an international project initiated by Denmark, Poland and Spain.     | Informal caregivers                        | Teleassistance                  | Internet<br>Mobile telecommunications | Care<br>Quality of life      | <p>UnderstAID is a platform that helps informal caregivers to understand and aid their demented relatives. The platform is devised to be available in two versions, namely the light one for mobile appliance and the premium version. Also different activities leading to the popularization of the platform are planned. However, the study does not include evaluations of the platform with patients.</p>                                                                                                                                      |
| 2014        | Robot-ROSE [58]            | Scopus          | ROSE (Remotely Operated Service robot) was developed to perform home-care                                                                                                               | Informal caregivers                        | Assistive technologies          | Robotics<br>Aml                       | Care<br>Quality of           | <p>ROSE was developed to perform home-care tasks. Experiments with ROSE have shown this is feasible. The</p>                                                                                                                                                                                                                                                                                                                                                                                                                                        |

| <b>Year</b> | <b>Name of application</b> | <b>Database</b> | <b>Objective</b>                                                                                                                                                                                                                                         | <b>Type of group</b> | <b>Type of application</b> | <b>Technology applied</b> | <b>Domain of application</b> | <b>Significant Findings</b>                                                                                                                   |
|-------------|----------------------------|-----------------|----------------------------------------------------------------------------------------------------------------------------------------------------------------------------------------------------------------------------------------------------------|----------------------|----------------------------|---------------------------|------------------------------|-----------------------------------------------------------------------------------------------------------------------------------------------|
|             |                            |                 | tasks. ROSE was controlled from a distance (8 km) by caregivers to perform small tasks for the elder. The design of ROSE can be used to develop service robots for other domains, e.g. to perform security tasks, building maintenance and construction. |                      |                            |                           | life                         | design of ROSE can be used to develop service robots for other domains, e.g. to perform security tasks, building maintenance and construction |

Abbreviations: IS: Information Systems, Aml: Ambience Intelligence
